# Supplementary material for: Resistance and robustness of the global coral–symbiont network
Source: PubMed Central journal article supplement (PMC7317464; doi:10.1002/ecy.2990), 2020-02-14
Supplement: ECY-101-e02990-s006.pdf [file ECY-101-e02990-s006.pdf]

**Williams, S.D., and M.R. Patterson. 2020. Resistance and robustness of the global coral–symbiont network. Ecology.**

---

## **Data S2**

**Data S2 contains code and data files needed to run the network bleaching model, null network models, and robustness removal models. All code was written in Python 2.7.16 using a jupyter notebook or R version 3.5.1 using R studio. The code is also available via a GitHub repository, DOI: 10.5281/zenodo.3595582.**

---

## **Author**

Sara D. Williams  
Northeastern University, Marine Science Center  
430 Nahant Rd, Nahant MA 01908  
Williams.sar@husky.neu.edu

---

## **File list**

`Resistance.csv`: Results of bleaching model simulations and resistance calculations.

First column – Row number (ignore)

Spatial.Scale – Location/Spatial scale of network

R – Mean resistance value from 100 simulations of bleaching model

R\_std – Standard deviation of resistance values from 100 simulations of bleaching model

Simulation – Which network type, natural network or null network models (Network = natural network, Shuffled Tolerances, Random Bipartite Degree Conserved, Random Bipartite Not-Degree Conserved)

Group – Used for plotting convenience

Statlab – statistical significance label from randomization test results

`Robustness.csv`: Results of the robustness analyses

Network – Which location/spatial scale (abbreviated names)

Mean – Mean R50 value from 100 simulations

Std – Standard deviation of R50 value from 100 simulations

Model – Which removal model (Bleach = bleaching model, LT\_BH = average link tolerance high to low, LT\_BL=susceptible links, LT\_HL= susceptible host links, LT\_SL=susceptible symbiont links, Random\_link=random links, Degree\_high= high to low degree, Degree\_low=low to high degree, Random\_node=random nodes, Tolerance\_low=susceptible nodes)

Removed – links, both type of nodes, hosts, or symbionts

Type – link or node removal model

R50\_who – Which robustness scenario (both=total, hosts=host, symbms=symbiont)

Group2 – Used for plotting convenience

Group – Used for plotting convenience

Statlab – statistical significance label from randomization test results

Connectance – connectance of network

Hosts – number of hosts in network

Symbionts – number of symbionts in network

Links – number of links in network

TEST\_resistance\_perms.csv: For testing the statistics code in the R markdown file.

Net\_dtemp – resistance values from each bleaching model simulation of the natural network

hsrand\_dtemp – resistance values from each bleaching model simulation of the shuffled tolerances null network

rand\_dtemp – resistance values from each bleaching model simulation of the random tolerances null network

rbndc\_dtemp – resistance values from each bleaching model simulation of the RBNDc null network

rbdc\_dtemp – resistance values from each bleaching model simulation of the RBDC null network

Resistance\_RandomizationTest\_results.csv: Results of randomization tests of significance for the resistance results, details in Appendix S2.

Spatial Scale – Which network (abbreviations for Global, ocean-basins, or subregions)

Dif\_means – Difference in observed means

Obt\_p – Obtained P value

Obt\_f – Obtained F statistic

Pval –P value based on difference in F statistic; (number of permutations that resulted in a F.stat > obtained F.stat + 1)/(1+number of permutations)

Type1 –which network is being compared to type2 (natural or null models)

Type2—which network is being compared to type1 (natural or null models)

p\_adjust\_holm – holm adjusted p value

`Robustness_RandomizationTest_results.csv`: Results of randomization tests of significance for the robustness results, details in Appendix S2.

Spatial Scale – Which network (abbreviations for Global, ocean-basins, or subregions)

RobustnessType – Total, host, or symbiont robustness scenario

Dif\_means – Difference in observed means

Obt\_p – Obtained P value

Obt\_f – Obtained F statistic

Pval –P value based on difference in F statistic; (number of permutations that resulted in a F.stat > obtained F.stat + 1)/(1+number of permutations)

Type1 –which network is being compared to type2 (natural or null models)

Type2—which network is being compared to type1 (natural or null models)

p\_adjust\_holm – holm adjusted p value

`SwainSymsR.csv`: Swain et al. (2017) thermal tolerance ranks that are adapted for the symbiont node thermal tolerances. See Swain et al. (2017) for file description.

`BleachingModel_Resistance_Py27.ipynb`: Jupyter notebook for simulating the bleaching model (Eq. 1), calculating resistance, degree distribution fitting, the host-specific network, and the generalized network.

`BleachingModel_Resistance_Py27.pdf` – PDF of Jupyter notebook above.

`RemovalModels_Robustness_Py27.ipynb`: Jupyter notebook for the removal models and robustness analyses

`RemovalModels_Robustness_Py27.pdf`: PDF of Jupyter notebook above.

:

`StatisticsAndVisualization_R35.rmd`: Rmarkdown for visualizing the model results, statistics described in Appendix S2, and code for symbiont node tolerances.

`StatisticsAndVisualization_R35.nb.html`: html of Rmarkdown above.

---
